# Supplementary material for: Modulating the anodic electrochemiluminescence of graphitic carbon nitride by thiophene doping
Source: Royal Society of Chemistry journal article supplement (doi:10.1039/d2nj02764j), 2022-01-01
Supplement: d2nj02764j1.pdf [file d2nj02764j1.pdf]

# Enhanced Anodic Electrochemiluminescence of Graphitic Carbon Nitride by Thiophene Doping for Copper Ion

## Detection

Lichan Chen,\* Panpan Zhao, Libing Tian, Yini Wang, Shu-Feng Zhou

College of Chemical Engineering, Huaqiao University, Xiamen, 361021, China

\*E-mail: [lchen@hqu.edu.cn](mailto:lchen@hqu.edu.cn); Tel: +86-592-6162305

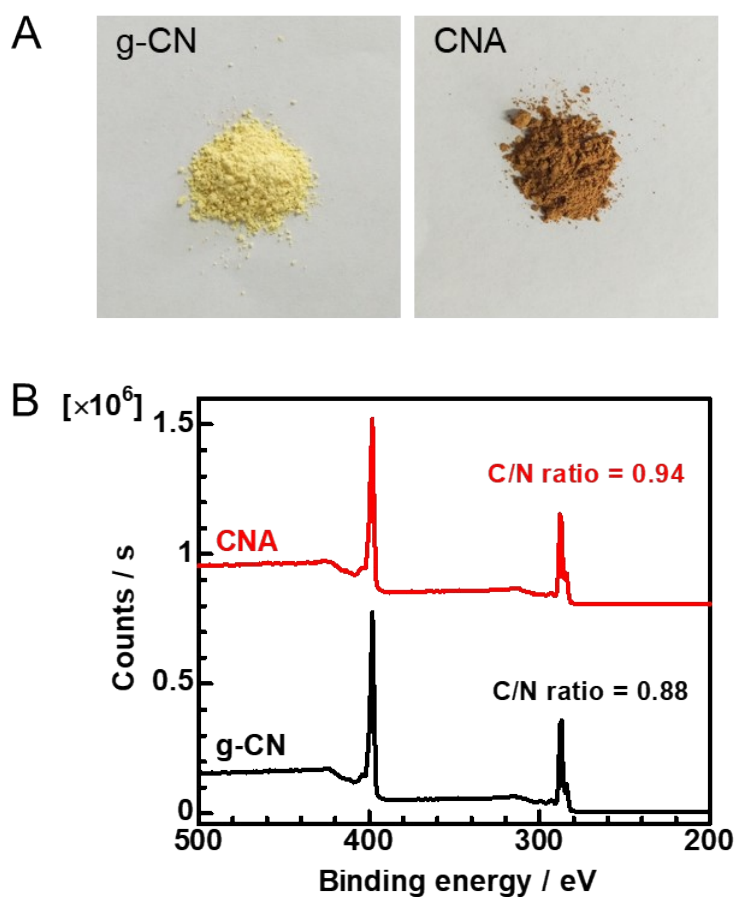

**Figure S1.** (A) Photos and (B) XPS survey spectra of bulk g-CN and CNA.

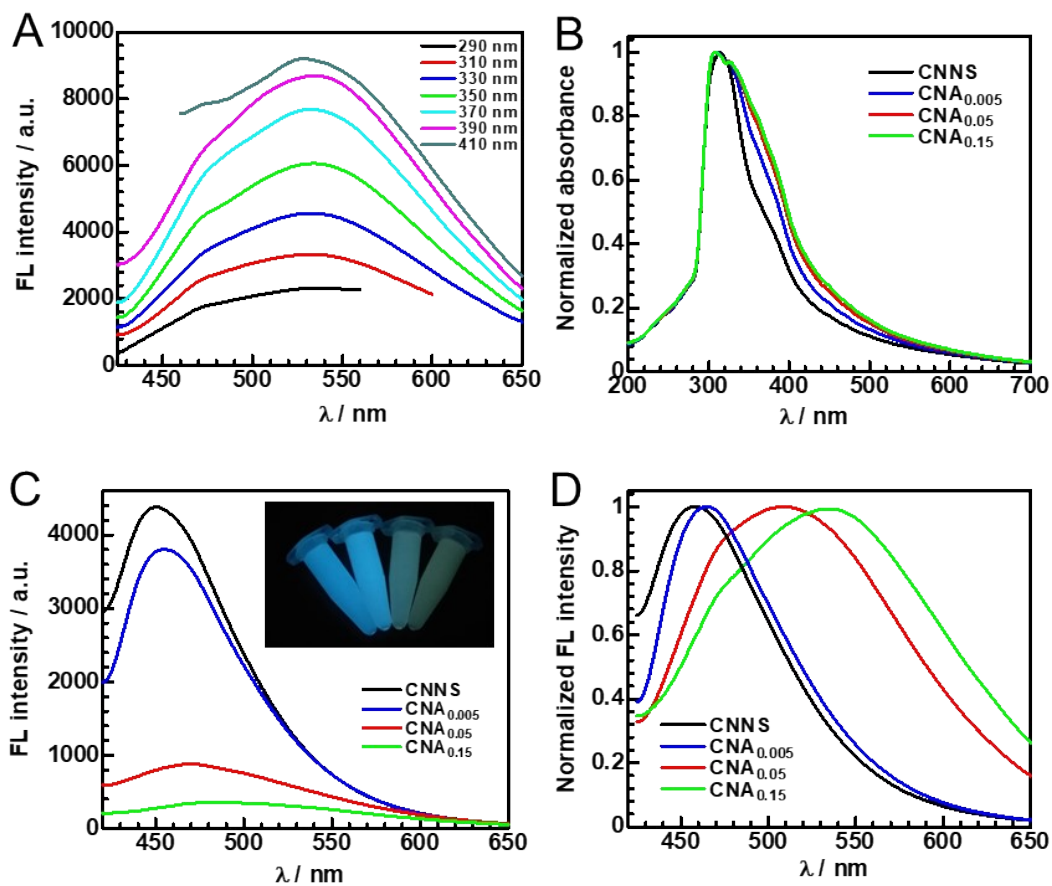

**Figure S2.** (A) Excitation wavelength-dependent fluorescence profile of CNA nanosheets. (B) UV-vis spectra of CNA<sub>x</sub> nanosheets. Intensity normalized. (C-D) FL spectra of CNA<sub>x</sub> nanosheets. The excitation wavelength was 390 nm. The inset was photos of CNA<sub>x</sub> nanosheets taken under 365 nm UV light, the order from left to right was CNNS, CNA<sub>0.005</sub>, CNA<sub>0.05</sub>, CNA<sub>0.15</sub> nanosheets.

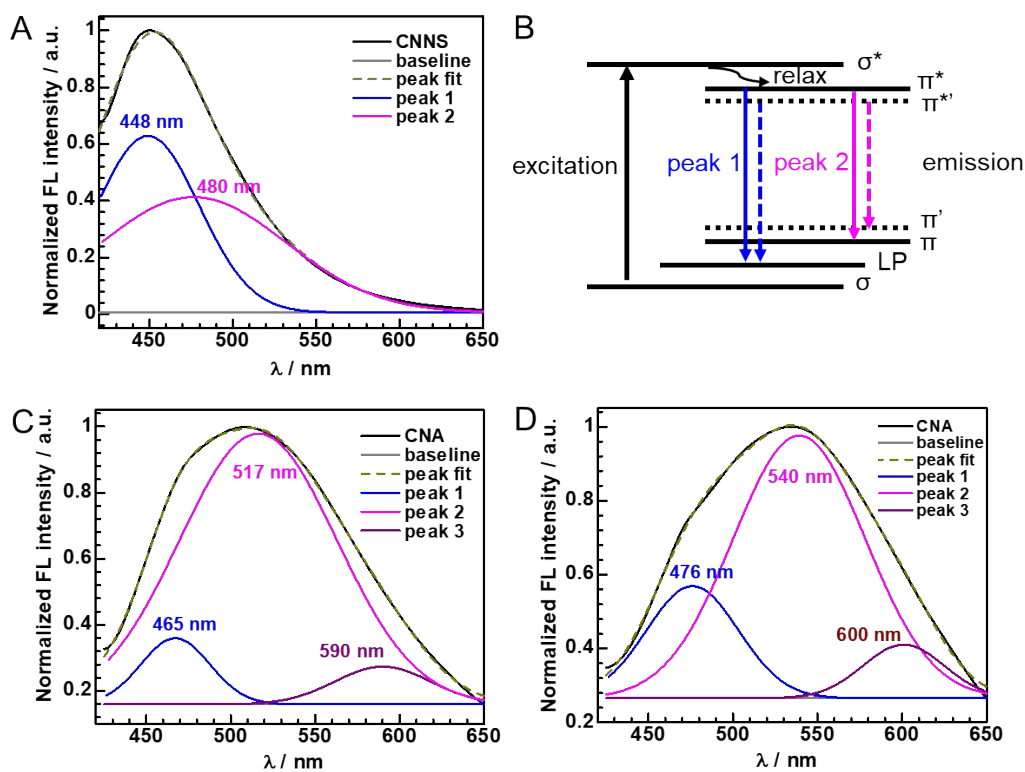

**Figure S3.** The Gaussian fitting of FL emission spectra of (A) CNNS, (C) CNA<sub>0.05</sub> nanosheets, (D) CNA<sub>0.15</sub> nanosheets. The excitation wavelength was 390 nm. (B) Schematic energy level diagram of radiative transition from CNA<sub>x</sub> nanosheets.

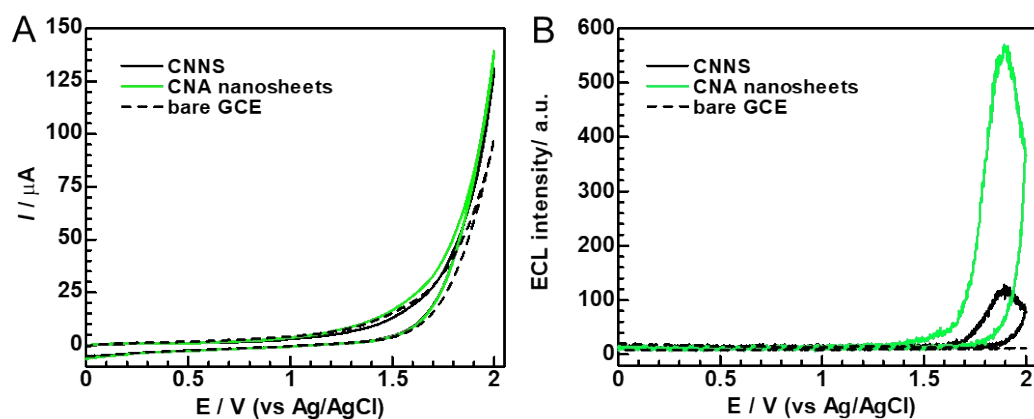

**Figure S4.** (A) Cyclic voltammetry and (B) ECL responses of bare GCE and CNNS and CNA nanosheets modified GCEs in 0.1 M PBS pH 7.0 with the potential range of 0-2.0 V at a scan rate of 0.1 V s<sup>-1</sup>.

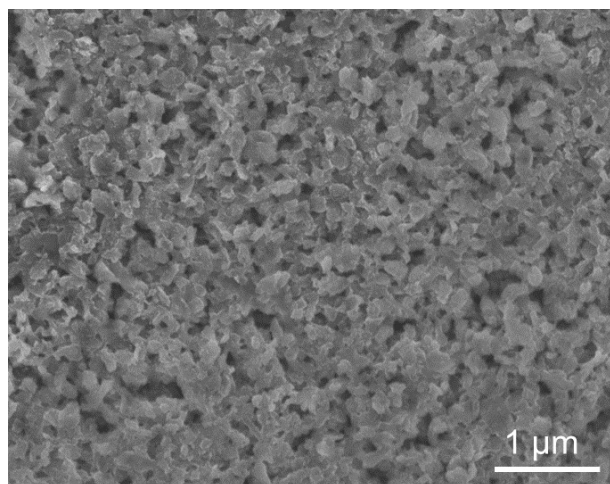

**Figure S5.** SEM image of the film formed by deposition of CNA nanosheets on GCEs.
